# Supplementary material for: Using common salt to impart pseudocapacitive functionalities to carbon nanofibers
Source: Royal Society of Chemistry journal article supplement (doi:10.1039/c4ta05121a), 2014-10-20
Supplement: c4ta05121a1.pdf [file c4ta05121a1.pdf]

## Electronic Supplementary Information

### Using Common Salt to Impart Pseudocapacitive Functionalities to Carbon Nanofibers

*Richa Singhal and Vibha Kalra*

Department of Chemical and Biological Engineering, Drexel University

3141 Chestnut Street, Philadelphia, PA 19104, USA

\*vk99@drexel.edu

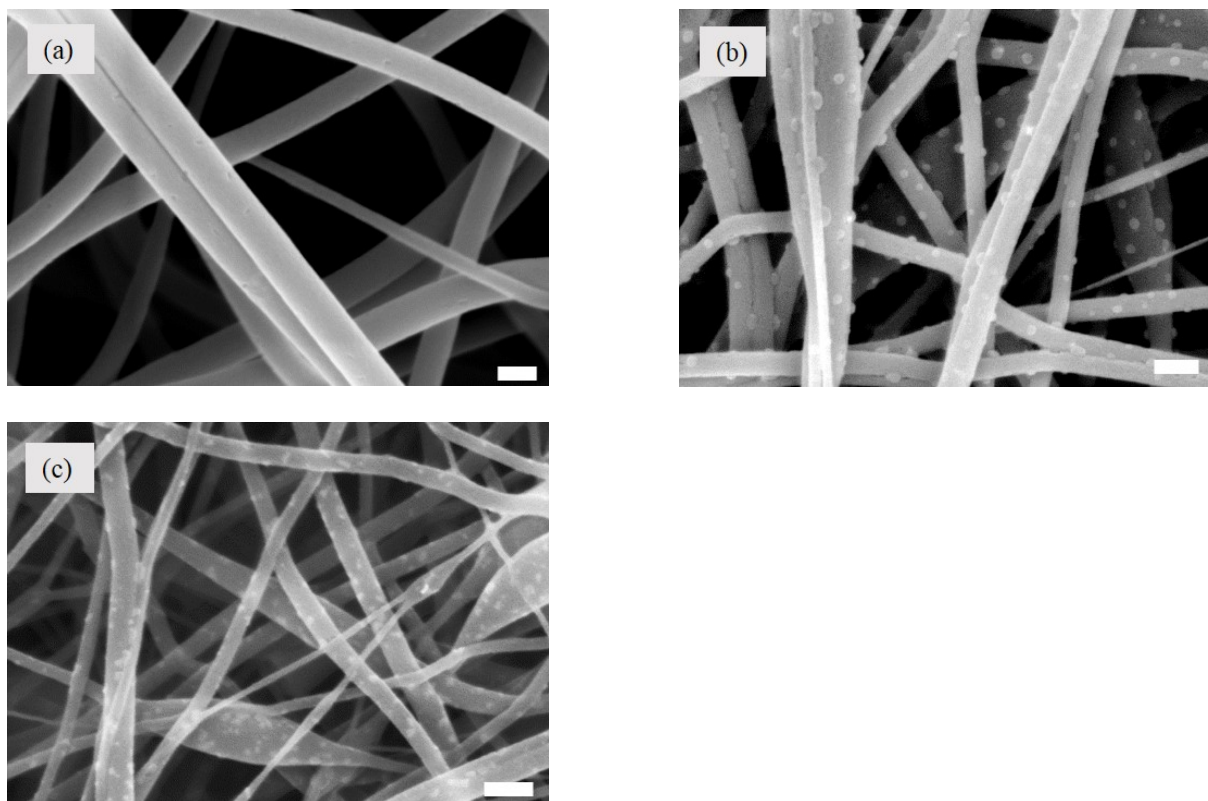

Fig. S1. SEM images of carbonized (a) CNF-0, (b) CNF-4, and (c) CNF-7 nanofibers. Scale bar is 200 nm.

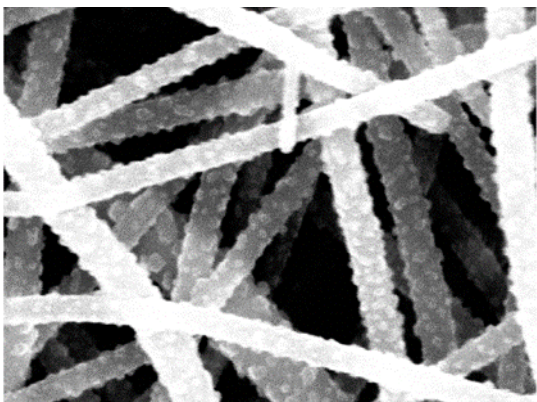

Electron Image 1

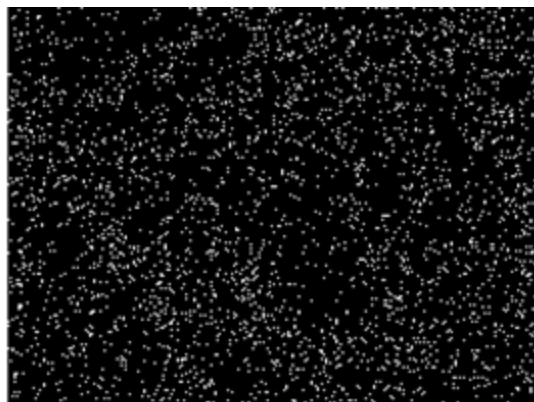

N Ka1\_2

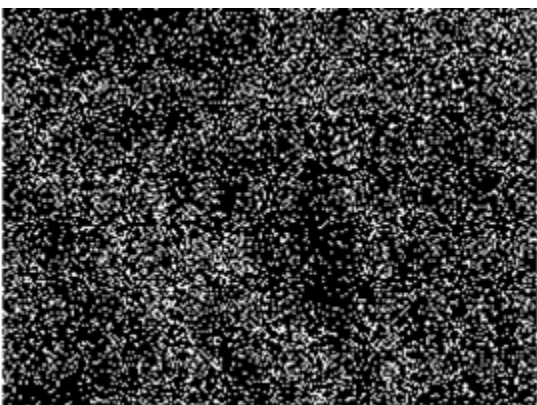

C Ka1\_2

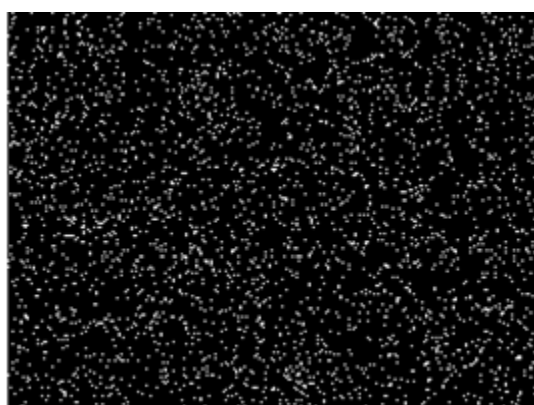

Na Ka1\_2

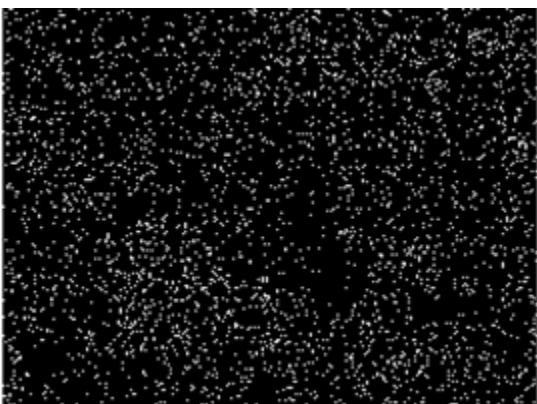

O Ka1

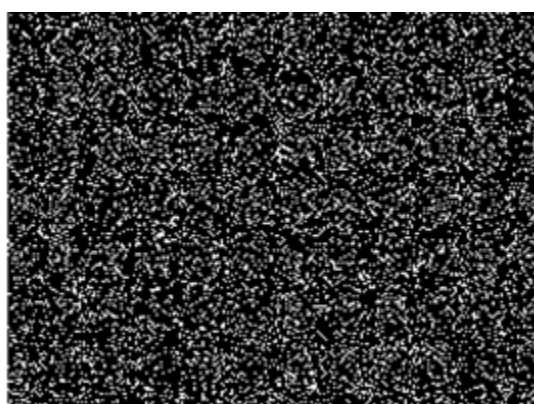

Cl Ka1

Fig. S2. EDS mapping of carbonized CNF-13 nanofibers showing uniform distribution of sodium and chlorine on the surface of nanofibers.

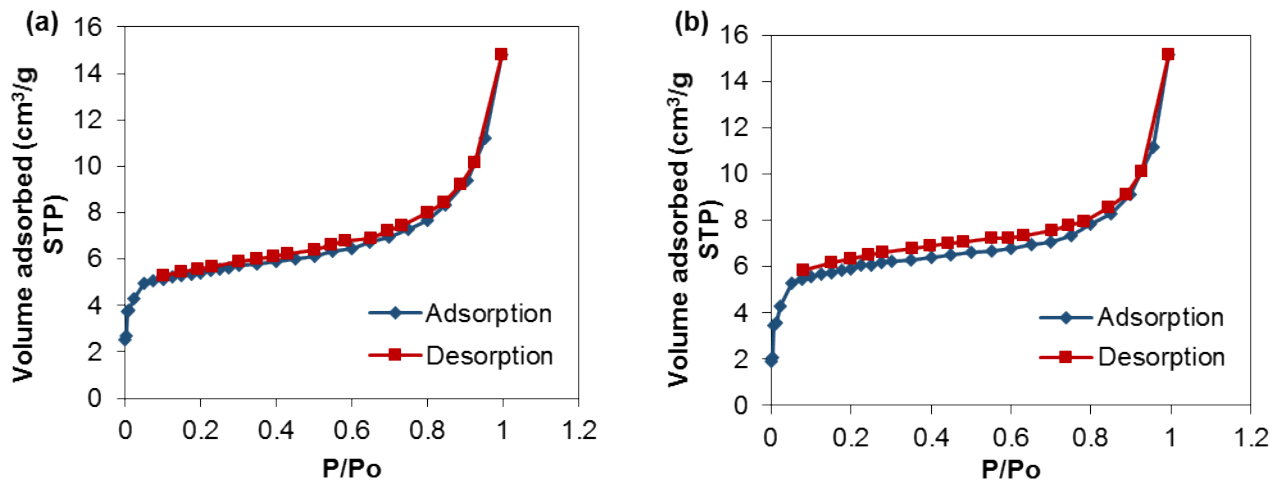

Fig. S3. Nitrogen adsorption-desorption isotherms for (a) carbonized and (b) treated CNF-13.

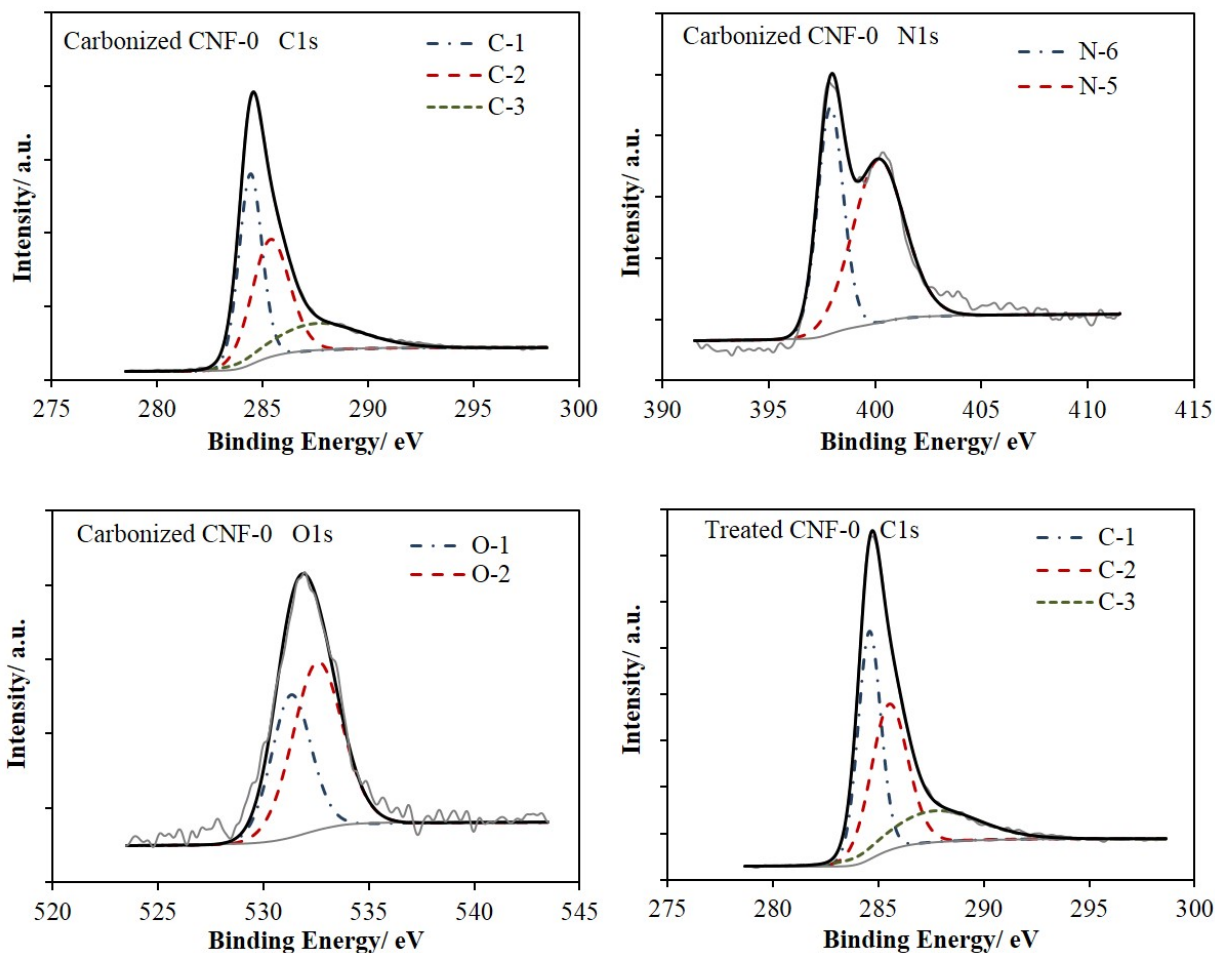

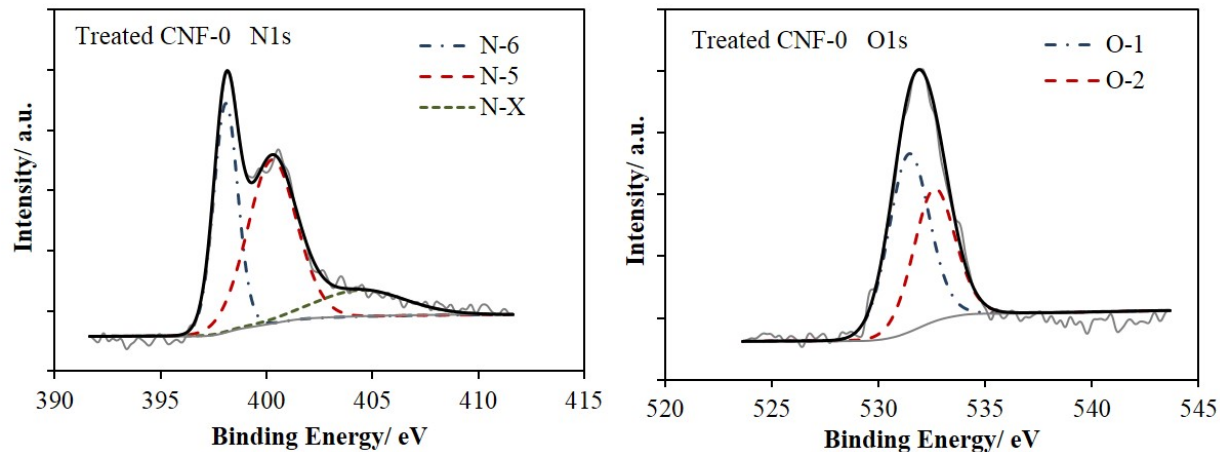

Fig. S4. Deconvoluted C1s, N1s, and O1s XPS peaks for carbonized and treated CNF-0 samples.

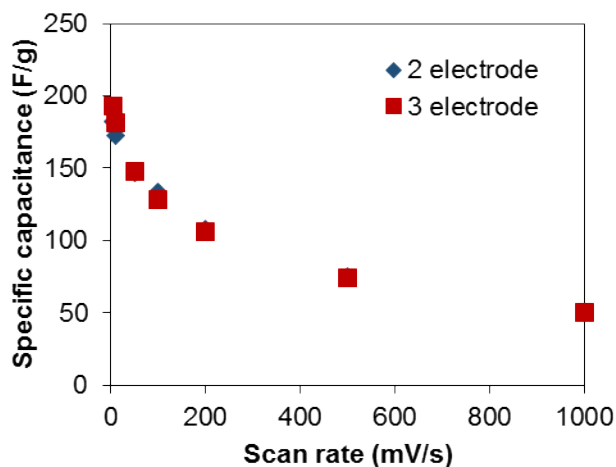

Fig. S5. Comparison of specific capacitance data of treated CNF-13 with 2-electrode and 3-electrode test cells at different scan rates in 1 M H<sub>2</sub>SO<sub>4</sub>.

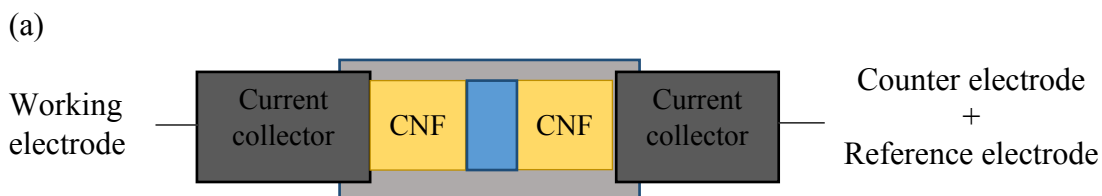

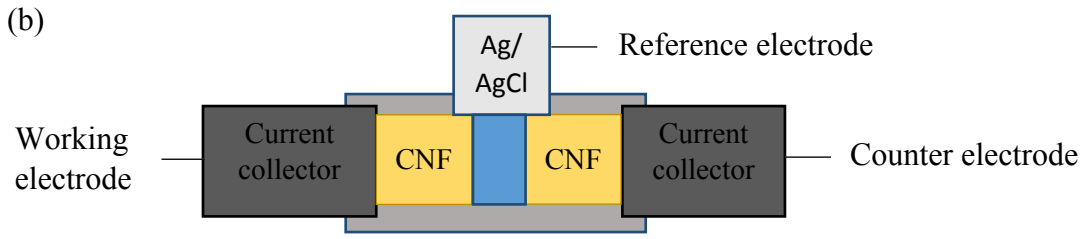

Fig. S6. Schematic of (a) 2-electrode and (b) 3-electrode setup.
